# Supplementary material for: The cis-trans binding strength defined by motif frequencies facilitates statistical inference of transcriptional regulation
Source: BMC Bioinformatics. 2019 May 1;20(Suppl 7):201. doi: 10.1186/s12859-019-2732-6 (PMC6509875; doi:10.1186/s12859-019-2732-6)
Supplement: Supplementary file 1 — The completed BASE 2.0 results of each motif, defining the TF binding affinities as motif frequencies. (CSV 33 kb) [file 12859_2019_2732_MOESM1_ESM.csv]

motif	pvalue.up	pvalue.down
V$ACAAT_B	0.185	0.292
V$AFP1_Q6	0.744	0.1521
V$AHR_01	0.0578	0.0082
V$AHR_Q5	0.443	0.255
V$AHR_Q6	0.0654	0.305
V$AHRARNT_01	0.594	0.446
V$AHRARNT_02	0.112	0.034
V$AHRHIF_Q6	0.0618	0.301
V$AIRE_01	0.967	0.264
V$AIRE_02	0.705	0.764
V$ALPHACP1_01	0.342	0.948
V$ALX3_01	0.0039	0.752
V$ALX3_02	0.709	0.335
V$ALX4_01	0.303	0.808
V$ALX4_02	0.0023	0.727
V$ALX4_03	0.49	0.659
V$AMEF2_Q6	0.192	0.909
V$AML_Q6	0.437	0.864
V$AML1_01	0.89	0.992
V$AML1_Q4	0.775	0.904
V$AML1_Q5	0.162	0.888
V$AML1_Q6	0.711	0.996
V$AML2_01	0.838	0.859
V$AML2_Q3	0.991	0.112
V$AML2_Q3_01	0.976	0.0708
V$AML3_Q6	0.646	0.799
V$AP1_01	0	0.236
V$AP1_02	0	0.357
V$AP1_C	0	0.412
V$AP1_Q2	0.0431	0.171
V$AP1_Q2_01	0.1278	0.384
V$AP1_Q4	0.168	0.469
V$AP1_Q4_01	0.0313	0.396
V$AP1_Q6	0.07	0.276
V$AP1_Q6_01	0.0471	0.34
V$AP1_Q6_02	5.00E-04	0.1279
V$AP1FJ_Q2	0.0514	0.18
V$AP2_Q3	0.42	0.0041
V$AP2_Q6	0.435	0.0263
V$AP2_Q6_01	0.578	0.0039
V$AP2ALPHA_01	0.437	0.0041
V$AP2ALPHA_02	0.716	0.0321
V$AP2ALPHA_03	0.554	0.0059
V$AP2ALPHA_Q6	0.439	0.0032
V$AP2BETA_Q3	0.647	0.0084
V$AP2GAMMA_01	0.404	0.0055
V$AP2GAMMA_Q5	0.46	0.0705
V$AP2REP_01	0.874	0.54
V$AP3_Q6	0.0109	0.967
V$AP4_01	0.741	0.0042
V$AP4_Q5	0.0722	0.268
V$AP4_Q6	0.608	0.0721
V$AP4_Q6_01	0.0972	0.323
V$AP4_Q6_02	0.402	0.031
V$APOLYA_B	0.713	0.725
V$AR_01	0.824	0.235
V$AR_02	0.219	0.244
V$AR_03	0.0693	0.324
V$AR_04	0.836	0.447
V$AR_Q2	0.0853	0.822
V$AR_Q6_01	0.0354	0.513
V$AREB6_01	0.0697	0.0402
V$AREB6_02	5.00E-04	0.214
V$AREB6_03	0.0553	0.2
V$AREB6_04	0.261	1
V$ARID3A_02	9.00E-04	0.599
V$ARID3A_04	0.0101	0.916
V$ARID5A_03	8.00E-04	0.99
V$ARID5A_04	0.0587	0.718
V$ARNT_01	0.232	0.0134
V$ARNT_02	0.35	0.1479
V$ARP1_01	1.00E-04	0.646
V$ARX_01	0.0032	0.77
V$ARX_02	0.288	0.64
V$ASCL2_03	0.0183	0.0799
V$ASCL2_04	0.563	0.0122
V$ATATA_B	0.016	0.643
V$ATF_01	0.83	0.309
V$ATF_B	0.76	0.773
V$ATF1_03	0.66	0.819
V$ATF1_04	0.327	0.683
V$ATF1_Q6	0.544	0.574
V$ATF1_Q6_01	0.461	0.302
V$ATF2_Q5	0.456	0.905
V$ATF3_Q6	0.1756	0.612
V$ATF3_Q6_01	0.1082	0.895
V$ATF4_Q2	0.822	0.1303
V$ATF4_Q6	0.521	0.997
V$ATF5_01	0.1014	0.0432
V$ATF6_01	0.706	0.914
V$BACH1_01	0.1223	0.926
V$BACH2_01	0.0278	0.894
V$BARBIE_01	0.542	0.435
V$BARHL1_01	0.0039	0.712
V$BARHL2_01	0.0039	0.672
V$BARX1_01	0.001	0.464
V$BARX2_01	0.0048	0.549
V$BBX_03	0.0222	0.642
V$BBX_04	0.0111	0.898
V$BCL6_01	0.0036	0.799
V$BCL6_02	0.0048	0.515
V$BCL6_Q3	0.0084	0.0089
V$BCL6_Q3_01	4.00E-04	0.666
V$BCL6B_03	0.0606	0.313
V$BCL6B_04	0.617	0.0454
V$BDP1_01	0.753	0.972
V$BEL1_B	0.986	0.792
V$BEN_01	0.361	0.0011
V$BEN_02	0.279	0.0013
V$BETACATENIN_Q3	0.1109	0.947
V$BHLHB2_04	0.417	0.172
V$BLIMP1_Q6	0.847	0.262
V$BRACH_01	0.659	0.243
V$BRCA_01	0.1215	0.849
V$BRF1_01	0.83	0.307
V$BRN2_01	0.0091	0.833
V$BRN3C_01	3.00E-04	0.731
V$BRN4_01	0.0055	0.858
V$BSX_01	9.00E-04	0.514
V$BTEB3_Q5	0.845	0.0609
V$CAAT_01	0.606	0.25
V$CAAT_C	0.761	0.702
V$CACBINDINGPROTEIN_Q6	0.791	0.0435
V$CACCCBINDINGFACTOR_Q6	0.821	0.0592
V$CACD_01	0.594	0.0089
V$CAP_01	1.00E-04	0.619
V$CARRXR_Q2	3.00E-04	0.594
V$CART1_01	0.0093	0.905
V$CART1_02	0.0273	0.865
V$CART1_03	0.0308	0.763
V$CBF_01	0.168	7.00E-04
V$CBF_02	0.848	0.805
V$CDC5_01	0.0471	0.1015
V$CDP_01	0.0012	0.647
V$CDP_02	0.0023	0.606
V$CDP_03	0.0016	0.674
V$CDP_04	0	0.661
V$CDPCR1_01	0.0159	0.554
V$CDPCR3_01	0.0765	0.943
V$CDPCR3HD_01	0.0167	0.685
V$CDX_Q5	0.0108	0.516
V$CDX1_01	0.0087	0.624
V$CDX1_Q5	0.0527	0.443
V$CDX2_01	0.0656	0.346
V$CDX2_Q5	0.0048	0.382
V$CDX2_Q5_01	0.0156	0.825
V$CDX2_Q5_02	0.0189	0.634
V$CDXA_01	0.0389	0.861
V$CDXA_02	0.0273	0.746
V$CEBP_01	0	0.651
V$CEBP_C	0.0049	0.686
V$CEBP_Q2	0.0075	0.962
V$CEBP_Q2_01	0.0137	0.658
V$CEBP_Q3	0.013	0.571
V$CEBPA_01	0.0195	0.92
V$CEBPA_Q6	0.0058	0.571
V$CEBPB_01	0.0111	0.878
V$CEBPB_02	0.0039	0.663
V$CEBPB_Q6	0.011	0.828
V$CEBPD_Q6	0.058	0.559
V$CEBPD_Q6_01	0.0043	0.735
V$CEBPE_01	6.00E-04	0.969
V$CEBPE_Q6	0.0174	0.449
V$CEBPG_Q6	0.0019	0.474
V$CEBPG_Q6_01	0.0067	0.787
V$CETS1_01	0.403	0.0066
V$CETS1_02	0.611	0.0354
V$CETS1_Q6	0.691	0.0433
V$CETS168_Q6	0.91	0.0048
V$CETS1P54_01	0.788	0.0092
V$CETS1P54_02	0.817	0.0218
V$CETS1P54_03	0.697	0.0106
V$CETS2_01	0.328	0.0574
V$CETS2_02	0.463	0.0361
V$CHCH_01	0.559	0.028
V$CHOP_01	6.00E-04	0.648
V$CHREBP_Q6	0.306	0.63
V$CHX10_01	0.798	0.629
V$CIZ_01	0.043	0.944
V$CJUN_Q6	0.0034	0.283
V$CKROX_Q2	0.773	0.217
V$CLOCKBMAL_Q6	0.384	0.843
V$CLOX_01	0.0062	0.692
V$CMAF_01	0.0661	0.1483
V$CMAF_02	2.00E-04	0.785
V$CMYB_01	0.71	0.473
V$CMYB_Q5	0.332	0.497
V$CMYC_01	0.576	0.1179
V$CMYC_02	0.676	0.222
V$CNOT3_01	0.205	0.0036
V$COE1_Q6	0.349	0.0095
V$COMP1_01	0.156	0.0843
V$COREBINDINGFACTOR_Q6	0.503	0.654
V$COUP_01	0	0.1532
V$COUPDR1_Q6	4.00E-04	0.355
V$COUPTF_Q6	3.00E-04	0.1183
V$COUPTF1_Q6_01	0.0123	0.0313
V$COUPTF2_Q6	0	0.427
V$CP2_01	0.705	0.001
V$CP2_02	0.821	0.0041
V$CPBP_Q6	0.78	0.032
V$CPHX_01	0	0.552
V$CREB_01	0.691	0.771
V$CREB_02	0.928	0.257
V$CREB_Q2	0.772	0.82
V$CREB_Q2_01	0.25	0.991
V$CREB_Q3	0.798	0.295
V$CREB_Q4	0.999	0.841
V$CREB_Q4_01	0.173	0.873
V$CREB1_01	0.72	0.514
V$CREB1_Q6	0.262	0.825
V$CREBATF_Q6	0.772	0.26
V$CREBP1_01	0.0592	0.865
V$CREBP1_Q2	0.945	0.584
V$CREBP1CJUN_01	0.27	0.67
V$CREL_01	0.616	0.009
V$CREL_Q6	0.0171	0.0111
V$CREM_Q6	0.489	0.426
V$CRX_02	0.1608	0.1009
V$CRX_Q4	0.0976	0.235
V$CRX_Q4_01	0.1014	0.959
V$CTCF_01	0.573	0.0035
V$CTCF_02	0.644	0.0033
V$CTF_01	0.583	0.1266
V$CTF1_01	0.923	0.0325
V$CUX1_03	6.00E-04	0.43
V$CUX1_04	0.001	0.98
V$DAX1_01	0.0043	0.864
V$DBP_Q6	0.383	0.336
V$DBP_Q6_01	0.0153	0.983
V$DBX1_01	0.0046	0.773
V$DBX2_01	5.00E-04	0.783
V$DEAF1_01	0.0958	0.0037
V$DEAF1_02	0.295	0.1146
V$DEC_Q1	0.0149	0.299
V$DEC1_Q2	0.626	0.298
V$DEC2_Q2	0.1227	0.126
V$DELTAEF1_01	0.0076	0.219
V$DLX1_01	0.0014	0.602
V$DLX2_01	0.0019	0.533
V$DLX3_01	0.0016	0.549
V$DLX3_02	0.784	0.803
V$DLX5_01	0.0175	0.665
V$DLX5_Q3	0.0247	0.912
V$DLX7_01	0.0024	0.543
V$DMRT1_01	0.0095	0.877
V$DMRT2_01	0.442	1
V$DMRT3_01	0.496	0.965
V$DMRT4_01	0.0461	1
V$DMRT5_01	0.652	0.776
V$DMRT7_01	0.404	0.994
V$DOBOX4_01	0.1128	1
V$DOBOX5_01	0	0.668
V$DR1_Q3	0.0067	0.492
V$DR3_Q4	0.326	0.186
V$DR4_Q2	0.947	0.0301
V$DRI1_01	0.384	0.689
V$DTYPEPA_B	0.504	0.489
V$DUXBL_01	0.191	0.17
V$DUXL_01	0.0013	0.811
V$E12_Q6	0.251	0.308
V$E2_01	0.427	0.022
V$E2_Q6	0.261	0.1452
V$E2_Q6_01	0.387	0.1056
V$E2A_Q2	0.1181	0.262
V$E2A_Q6	0.0917	0.391
V$E2A_Q6_01	0.072	0.283
V$E2F_01	0.0337	0.684
V$E2F_02	0.545	0.634
V$E2F_03	0.1051	0.0093
V$E2F_Q2	0.1167	0.0029
V$E2F_Q3	0.0785	0.0225
V$E2F_Q3_01	0.0938	0.0042
V$E2F_Q4	0.1298	0.223
V$E2F_Q4_01	0.069	0.0076
V$E2F_Q4_02	0.0655	0.0078
V$E2F_Q6	0.0707	0.161
V$E2F_Q6_01	0.1034	0.0058
V$E2F1_01	0.046	0.6
V$E2F1_02	0.0109	0.994
V$E2F1_Q3	0.0866	0.0059
V$E2F1_Q3_01	0.1102	0.002
V$E2F1_Q4	0.062	0.0097
V$E2F1_Q6	0.0779	0.0241
V$E2F1_Q6_01	0.0629	0.0048
V$E2F1DP1_01	0.0512	0.0095
V$E2F1DP1RB_01	0.0537	0.0466
V$E2F1DP2_01	0.0378	0.0311
V$E2F2_03	0.219	0.0032
V$E2F2_04	0.262	0.0026
V$E2F3_03	0.285	0.0133
V$E2F3_Q6	0.1194	0.0017
V$E2F4_04	0.247	0.0053
V$E2F4_Q6	0.1207	0.021
V$E2F4DP1_01	0.0689	0.0811
V$E2F4DP2_01	0.031	0.0235
V$E2F6_01	0.0713	0.0324
V$E47_01	0.0154	0.0813
V$E47_02	0.0176	0.0317
V$E4BP4_01	0.267	0.862
V$E4F1_Q6	0.222	0.453
V$E4F1_Q6_01	0.426	0.736
V$EAR2_Q2	0.001	0.734
V$EBF_Q6	0.29	0.1197
V$EBF1_01	0.818	0.0716
V$EBNA1_01	0.658	0.53
V$EBOX_Q6_01	0.0024	0.455
V$EFC_Q6	0.249	0.456
V$EGR_Q6	0.736	0.0895
V$EGR1_01	0.327	0.0223
V$EGR1_02	0.926	0.455
V$EGR1_04	0.754	0.1569
V$EGR1_06	0.693	0.1299
V$EGR1_Q6	0.703	0.1016
V$EGR2_01	0.825	0.336
V$EGR2_Q6	0.698	0.286
V$EGR3_01	0.241	0.0075
V$EHF_02	0.794	0.0709
V$EHF_03	0.735	0.269
V$EHF_06	0.774	0.0973
V$EHF_07	0.567	0.749
V$EKLF_Q5	0.614	0.298
V$ELF_02	0.173	0.0098
V$ELF1_01	0.257	0.1241
V$ELF1_Q5	0.532	0.0918
V$ELF1_Q6	0.0703	0.136
V$ELF2_02	0.261	0.1026
V$ELF4_01	0.455	0.0202
V$ELF4_02	0.1671	0.0047
V$ELF4_04	0.0501	0.95
V$ELF5_01	0.416	0.06
V$ELF5_02	0.842	0.254
V$ELF5_03	0.763	0.0108
V$ELF5_04	0.563	0.1198
V$ELK1_01	0.989	0.1051
V$ELK1_02	0.633	0.228
V$ELK1_03	0.558	0.21
V$ELK1_04	0.572	0.068
V$ELK1_05	0.203	0.0018
V$ELK1_06	0.205	0.0016
V$EMX2_01	0.0023	0.753
V$EN1_01	0.0083	0.77
V$EN1_02	0.0064	0.683
V$EN2_01	0.0019	0.579
V$EOMES_03	0.1271	0.987
V$EOMES_04	0.305	0.201
V$ER_Q6	0.0147	0.414
V$ER71_01	0.197	0.0237
V$ER71_02	0.207	0.0112
V$ER81_01	0.1115	0.0073
V$ER81_02	0.369	0.0162
V$ERALPHA_01	0.271	0.53
V$ERALPHA_Q6_01	0.611	0.1383
V$ERBETA_Q5	0.506	0.164
V$ERF_01	0.439	0.0269
V$ERF_02	0.1449	0.0084
V$ERG_01	0.462	0.793
V$ERG_02	0.27	0.0961
V$ERG_03	0.378	0.365
V$ERM_01	0.179	0.0094
V$ERM_02	0.219	0.1498
V$ERR1_Q2_01	0.0061	0.163
V$ERR1_Q3	0.0796	0.0175
V$ERR2_01	0.1277	0.1273
V$ERR3_Q2	0.1578	0.919
V$ERR3_Q2_01	0.1546	0.941
V$ESE1_01	0.7	0.166
V$ESE1_02	0.794	0.0794
V$ESE1_Q3	0.809	0.293
V$ESR1_01	1	0.0109
V$ESR2_01	0.58	0.5
V$ESRRA_03	0.0279	0.942
V$ESRRA_04	0.955	0.174
V$ESX1_01	0.0034	0.755
V$ETF_Q6	0.302	0.009
V$ETS_B	0.009	0.0713
V$ETS_Q4	0.873	0.191
V$ETS_Q6	0.844	0.1419
V$ETS1_B	0.0637	0.0769
V$ETS2_Q6	0.908	0.0109
V$ETV3_01	0.167	0.0083
V$ETV3_02	0.17	0.0078
V$ETV7_01	0.7	0.233
V$EVI1_01	0.168	0.036
V$EVI1_02	0.497	0.0167
V$EVI1_03	0.0817	0.443
V$EVI1_04	0.291	0.0614
V$EVI1_05	0.0611	0.0304
V$EVI1_06	0.358	0.668
V$EVI1_Q3	0.0763	0.994
V$EVX1_01	0.0025	0.767
V$EVX2_01	0.004	0.637
V$EWSR1FLI1_01	0.326	0.0819
V$FAC1_01	0.192	0.947
V$FEV_01	0.815	0.636
V$FKHL5_Q3	0.195	0.951
V$FKLF_Q5	0.502	0.0331
V$FLI1_01	0.33	0.184
V$FLI1_02	0.358	0.035
V$FLI1_Q6	0.97	0.0057
V$FOX_Q2	0.3	0.989
V$FOXA2_02	0.1634	0.88
V$FOXA2_04	0.0319	0.685
V$FOXD3_01	0.1185	0.985
V$FOXJ1_03	0.276	0.993
V$FOXJ1_04	0.1257	0.826
V$FOXJ2_01	0.122	0.971
V$FOXJ2_02	0.0029	0.772
V$FOXJ3_06	0.325	0.997
V$FOXK1_03	0.0775	0.382
V$FOXK1_04	0.244	0.991
V$FOXL1_02	0.1364	0.952
V$FOXL1_04	0.536	0.599
V$FOXL2_Q2	0.119	0.88
V$FOXM1_01	9.00E-04	0.37
V$FOXO1_01	0.164	0.979
V$FOXO1_02	0.163	0.623
V$FOXO1_03	0.0346	0.493
V$FOXO1_04	0.0091	0.615
V$FOXO1_Q5	0.556	0.985
V$FOXO3_01	0.361	0.983
V$FOXO3_02	0.0162	0.766
V$FOXO3A_Q1	0.246	0.93
V$FOXO4_01	0.232	0.994
V$FOXO4_02	0.396	0.998
V$FOXP1_01	0.291	0.39
V$FOXP3_01	0.1485	0.948
V$FOXP3_Q4	0.032	0.0467
V$FPM315_01	0.569	0.254
V$FRA1_Q5	0.0175	0.586
V$FRA1_Q6	0.0503	0.639
V$FREAC2_01	0.195	0.888
V$FREAC3_01	0.0609	0.381
V$FREAC4_01	0.1045	0.391
V$FREAC7_01	0.161	0.978
V$FXR_Q3	0.0062	0.766
V$FXR_Q5	0.838	0.246
V$FXRIR1_Q6	0.1052	0.1769
V$GABP_B	0.979	0.0648
V$GABPA_01	0.189	0.0352
V$GABPA_02	0.1016	0.0073
V$GABPA_04	0.97	0.0665
V$GABPA_Q4	0.849	0.0286
V$GABPAGABPB_Q6	0.82	0.173
V$GABPBETA_Q3	0.877	0.0261
V$GADP_01	0.573	0.683
V$GAF_Q6	0.999	0.869
V$GATA_C	4.00E-04	0.02
V$GATA_Q6	0.0013	0.425
V$GATA1_01	0.1402	0.568
V$GATA1_02	0.0071	0.0214
V$GATA1_03	0	0.428
V$GATA1_04	0.0017	0.0887
V$GATA1_05	0.0093	0.211
V$GATA1_06	0.003	0.236
V$GATA1_Q6	4.00E-04	0.251
V$GATA2_01	0.176	0.793
V$GATA2_02	5.00E-04	0.1188
V$GATA2_03	0.004	0.218
V$GATA2_Q5	0.001	0.534
V$GATA3_01	0.0036	0.437
V$GATA3_02	0	0.357
V$GATA3_03	2.00E-04	0.378
V$GATA3_05	0.339	0.436
V$GATA3_Q4	8.00E-04	0.371
V$GATA4_Q3	0.0045	0.318
V$GATA4_Q5_01	0.0028	0.571
V$GATA5_03	0.0019	0.339
V$GATA5_04	0.0074	0.431
V$GATA5_Q4	0.0013	0.317
V$GATA6_01	8.00E-04	0.504
V$GATA6_04	6.00E-04	0.1308
V$GATA6_05	0.175	0.259
V$GATA6_Q5	0.0015	0.364
V$GBX1_01	5.00E-04	0.649
V$GBX2_01	0.0058	0.609
V$GC_01	0.565	0.0234
V$GCM_Q2	0.878	0.331
V$GCM1_03	0.478	0.023
V$GCM1_04	0.864	0.342
V$GCMA_Q4	0.413	0.265
V$GCNF_01	0.0227	0.255
V$GCNF_Q3	0.628	0.558
V$GEN_INI_B	7.00E-04	0.424
V$GEN_INI2_B	7.00E-04	0.322
V$GEN_INI3_B	0.001	0.319
V$GFI1_01	0.0465	0.544
V$GFI1_Q6	0.0045	0.53
V$GFI1_Q6_01	0.0248	0.716
V$GFI1B_01	0.0139	0.526
V$GKLF_02	0.539	0.0194
V$GKLF_Q4	0.809	0.0208
V$GLI_Q2	0.83	0.277
V$GLI1_01	0.1237	0.258
V$GLI1_Q2	0.658	0.027
V$GLI2_01	0.364	0.162
V$GLI3_01	0.735	0.461
V$GLI3_02	0.797	0.1215
V$GLI3_Q5_01	0.997	0.562
V$GLIS2_03	0.999	0.831
V$GLIS2_04	0.0075	0.753
V$GM397_03	0.0688	0.262
V$GM497_04	0.83	0.97
V$GMEB1_03	0.1023	0.446
V$GMEB1_04	0.0815	0.004
V$GR_01	8.00E-04	0.372
V$GR_Q6	0.0482	0.927
V$GR_Q6_02	0	0.0055
V$GRE_C	0.0017	0.695
V$GSC_01	4.00E-04	0.589
V$GSH2_01	0.0031	0.691
V$GTF2IRD1_01	3.00E-04	0.242
V$GZF1_01	0.935	0.501
V$HAND1E47_01	0.198	0.1434
V$HB24_01	0.0028	0.708
V$HB9_01	0.0064	0.573
V$HBP1_03	0.2	0.178
V$HBP1_04	0.0193	0.687
V$HBP1_Q2	0.0016	0.881
V$HDX_01	0.0013	0.727
V$HEB_Q6	0.76	0.303
V$HELIOSA_01	0.972	0.199
V$HELIOSA_02	0.039	0.0612
V$HEN1_01	0.263	0.792
V$HEN1_02	0.323	0.801
V$HEN2_Q2	0.0053	0.271
V$HES1_Q2	0.448	0.0434
V$HES1_Q6	0.216	0.0166
V$HFH1_01	0.1387	1
V$HFH3_01	0.302	0.991
V$HFH4_01	0.283	0.747
V$HFH8_01	0.256	0.959
V$HIC1_02	0.688	0.0984
V$HIC1_03	0.455	0.0092
V$HIC1_05	0.998	0.518
V$HIC1_06	0.423	0.785
V$HIF1_Q3	0.0709	0.1006
V$HIF1_Q5	0.0382	0.0197
V$HIF1A_Q6	0.0389	0.182
V$HIF1AARNT_01	0.0415	0.216
V$HIF2A_01	0.0858	0.782
V$HLF_01	0.0379	0.913
V$HMBOX1_01	0.002	0.502
V$HMEF2_Q6	0.0784	0.742
V$HMGA2_01	0.558	0.94
V$HMGIY_01	0.0534	1
V$HMGIY_Q3	0.025	0.964
V$HMGIY_Q4	0.0596	0.652
V$HMGIY_Q6	0.0231	0.523
V$HMX1_01	0.615	0.498
V$HMX1_02	0.0023	0.697
V$HMX3_02	8.00E-04	0.639
V$HNF1_01	0.0504	0.921
V$HNF1_02	0.0203	0.523
V$HNF1_C	0.003	0.999
V$HNF1_Q6	0.0092	0.801
V$HNF1_Q6_01	0.136	0.99
V$HNF1A_01	0.0113	0.756
V$HNF1A_Q5	0.0418	0.839
V$HNF1B_01	0.0023	0.578
V$HNF1B_04	0.0085	0.452
V$HNF3_Q6	0.156	0.935
V$HNF3_Q6_01	0.1449	0.871
V$HNF3A_01	0.1356	0.634
V$HNF3ALPHA_Q6	0.235	0.964
V$HNF3B_01	0.1235	0.97
V$HNF3B_Q6	0.0137	0.927
V$HNF3G_Q4	0.251	0.994
V$HNF4_01	0.0976	0.708
V$HNF4_01_B	0.0216	0.362
V$HNF4_Q6_01	0	0.353
V$HNF4A_02	0	0.174
V$HNF4A_03	0.0196	0.291
V$HNF4A_04	0.966	0.0365
V$HNF4A_Q6_01	2.00E-04	0.47
V$HNF4ALPHA_Q6	1.00E-04	0.553
V$HNF4DR1_Q3	0.0032	0.583
V$HNF6_Q6	0.024	0.902
V$HOMEZ_01	0.0168	0.877
V$HOX13_01	0.0714	0.378
V$HOX13_02	0.0204	0.963
V$HOXA1_01	0.0033	0.663
V$HOXA10_01	0.003	0.796
V$HOXA11_01	0.0038	0.683
V$HOXA13_01	0.0654	0.592
V$HOXA13_02	0.0487	0.554
V$HOXA13_03	0.0071	0.86
V$HOXA2_01	0.0015	0.695
V$HOXA3_01	0.0014	0.646
V$HOXA3_02	8.00E-04	0.665
V$HOXA3_07	0.0096	0.881
V$HOXA4_01	0.0013	0.785
V$HOXA4_Q2	1.00E-04	0.383
V$HOXA5_03	0.0303	0.951
V$HOXA6_01	0.0051	0.567
V$HOXA7_01	0.1043	0.976
V$HOXA7_02	9.00E-04	0.64
V$HOXA7_03	0.002	0.625
V$HOXA9_01	0.0123	0.731
V$HOXB13_01	0.0081	0.815
V$HOXB3_01	4.00E-04	0.601
V$HOXB4_01	7.00E-04	0.746
V$HOXB5_01	0.0023	0.657
V$HOXB6_01	0.0028	0.619
V$HOXB7_01	0.0028	0.602
V$HOXB8_01	0.0901	0.585
V$HOXB9_01	0.0044	0.869
V$HOXC10_01	0.0147	0.73
V$HOXC11_01	0.01	0.628
V$HOXC12_01	0.024	0.813
V$HOXC13_01	0.0117	0.679
V$HOXC4_01	0.0018	0.69
V$HOXC5_01	8.00E-04	0.654
V$HOXC6_01	0.0014	0.641
V$HOXC8_01	0.0038	0.663
V$HOXC9_01	0.0062	0.755
V$HOXD1_01	8.00E-04	0.664
V$HOXD10_01	0.0088	0.844
V$HOXD11_01	0.0238	0.755
V$HOXD12_01	0.0219	0.82
V$HOXD13_01	0.0061	0.828
V$HOXD3_01	8.00E-04	0.66
V$HOXD8_01	0.0018	0.795
V$HOXD9_Q2	0.0101	0.683
V$HP1SITEFACTOR_Q6	0.459	0.743
V$HSF_Q6	0.252	0.273
V$HSF1_01	0	0.0799
V$HSF1_Q6	0.542	0.184
V$HSF1_Q6_01	0.855	0.0224
V$HSF2_01	0.73	0.24
V$HSF2_02	0.0207	0.1365
V$HTF_01	0.173	0.217
V$HTF4_Q2	0.0187	0.277
V$ICSBP_Q6	0.318	0.408
V$IK_Q5	1	0.0646
V$IK1_01	0.684	0.191
V$IK2_01	0.846	0.0825
V$IK3_01	0.633	0.68
V$ING4_01	0.999	0.83
V$INSM1_01	0.736	0.476
V$IPF1_01	0.0092	0.934
V$IPF1_02	0.0011	0.768
V$IPF1_03	0.0205	0.784
V$IPF1_04	0.0088	0.465
V$IPF1_05	0.0376	0.719
V$IPF1_06	0.0352	0.999
V$IPF1_Q4	0.0041	0.728
V$IPF1_Q4_01	0.0082	0.894
V$IPF1_Q5	0.0074	0.9
V$IPF1_Q6	0.0087	0.913
V$IRC900814_03	0.0628	0.448
V$IRC900814_04	0.103	0.933
V$IRF_Q6	0.251	0.0672
V$IRF_Q6_01	0.1616	0.0542
V$IRF1_01	0.431	0.328
V$IRF1_Q6	0.255	0.0759
V$IRF1_Q6_01	0.109	0.134
V$IRF2_01	0.358	0.0826
V$IRF2_Q6	0.711	0.316
V$IRF3_05	0.1395	0.1514
V$IRF3_06	0.585	0.1062
V$IRF3_Q3	0.0385	0.785
V$IRF4_03	0.381	0.0253
V$IRF4_04	0.87	0.2
V$IRF4_Q6	0.0049	0.23
V$IRF5_03	0.267	0.0089
V$IRF5_04	0.421	0.409
V$IRF6_03	0.321	0.187
V$IRF6_04	0.814	0.275
V$IRF7_01	0.1479	0.317
V$IRF7_Q3	0.413	0.0088
V$IRF7_Q3_01	0.0316	0.0654
V$IRF8_Q6	0.02	0.788
V$IRX2_01	0	0.443
V$IRX3_01	2.00E-04	0.41
V$IRX3_02	2.00E-04	0.37
V$IRX4_01	0	0.466
V$IRX5_01	0	0.347
V$IRXB3_01	2.00E-04	0.448
V$ISGF3G_03	0.56	0.0225
V$ISGF4G_04	0.033	0.889
V$ISL1_Q6	0.0141	0.897
V$ISL2_01	7.00E-04	0.547
V$ISL2_02	0.0036	0.748
V$ISL2_03	0.0031	0.316
V$ISL2_04	0.0018	0.662
V$ISL2_05	0	0.391
V$ISRE_01	0.179	0.354
V$ISX_01	9.00E-04	0.534
V$JUNB_Q6	0	0.109
V$JUND_Q6	0.0012	0.323
V$JUNDM2_03	0.952	0.7
V$JUNDM2_04	0.0293	0.304
V$K2B_01	0.0035	0.681
V$KAISO_01	0.296	0.133
V$KID3_01	0.999	0.592
V$KLF15_Q2	0.659	0.1609
V$KLF3_Q3	0.616	0.362
V$KLF7_03	0.425	0.166
V$KLF7_04	0.199	0.0171
V$KROX_Q6	0.663	0.0894
V$LBP1_Q6	0.773	0.022
V$LBP1_Q6_01	1	0.0035
V$LBP9_01	0.784	0.0206
V$LBX2_01	4.00E-04	0.587
V$LDSPOLYA_B	0.247	0.993
V$LEF1_03	1.00E-04	0.595
V$LEF1_04	6.00E-04	1
V$LEF1_Q2	0.0044	1
V$LEF1_Q2_01	0.012	0.913
V$LEF1_Q5	0.0289	0.843
V$LEF1_Q5_01	0.0145	0.962
V$LEF1TCF1_Q4	0.0022	0.956
V$LFA1_Q6	0.812	0.007
V$LHX2_01	0.0037	0.714
V$LHX3_01	0.0435	0.845
V$LHX3_Q3	0.0017	0.572
V$LHX3A_01	0.41	0.119
V$LHX3b_01	0.0046	0.821
V$LHX4_01	0.0021	0.581
V$LHX5_01	0.0022	0.736
V$LHX61_01	3.00E-04	0.653
V$LHX61_02	0.0014	0.661
V$LHX8_01	0.0012	0.58
V$LHX9_01	0.0014	0.622
V$LIM1_01	0.0018	0.657
V$LMO2COM_01	0.1272	0.083
V$LMO2COM_02	1.00E-04	0.312
V$LMX1_01	0.002	0.7
V$LMX1B_01	0.0089	0.79
V$LPOLYA_B	0.447	0.0632
V$LRF_Q2	0.834	0.0657
V$LRH1_Q5	0.001	0.1191
V$LRH1_Q5_01	0.0035	0.182
V$LTF_Q6	0.0025	0.305
V$LUN1_01	0.263	0.909
V$LXR_Q3	0.923	0.0379
V$LXR_Q6	0.352	0.316
V$LXRBRXRA_Q5	0.303	0.214
V$LXRBRXRA_Q5_01	0.0566	0.589
V$LXRDR4_Q3	0.654	0.226
V$LYF1_01	0.121	0.27
V$MAF_Q6	0.96	0.02
V$MAF_Q6_01	0.0727	0.447
V$MAFA_Q4	0.0257	0.759
V$MAFA_Q5	3.00E-04	0.1642
V$MAFB_01	0.0023	0.84
V$MAFB_03	0.0021	0.783
V$MAFB_05	0.1006	0.221
V$MAFK_03	0.0093	0.384
V$MAFK_04	0.326	0.85
V$MAFK_Q3	0.43	0.74
V$MATH1_Q2	0.132	0.474
V$MAX_01	0.51	0.944
V$MAX_04	0.668	0.1049
V$MAX_Q6	0.343	0.479
V$MAZ_Q6	0.806	0.1321
V$MAZ_Q6_01	0.518	0.0585
V$MAZR_01	0.614	0.356
V$MECP2_01	0.369	0.009
V$MECP2_02	0.172	0.04
V$MEF2_01	0.1219	0.996
V$MEF2_02	8.00E-04	0.995
V$MEF2_03	0.0278	0.999
V$MEF2_04	0.0174	0.777
V$MEF2_Q6_01	0.0962	0.893
V$MEF2A_05	0.0064	0.836
V$MEF2A_Q6	0.219	0.955
V$MEF2C_Q4	0.0839	0.95
V$MEF2D_Q4	0.0103	0.855
V$MEF3_B	0.393	0.167
V$MEIS1_01	0.0291	0.351
V$MEIS1_02	0.906	0.1492
V$MEIS1AHOXA9_01	0.0159	0.442
V$MEIS1BHOXA9_02	0.012	0.1026
V$MEIS2_01	0	0.343
V$MEQ_01	0.315	0.991
V$MEQCJUN_02	0.164	0.953
V$MIF1_01	0.908	0.357
V$MINI19_B	0.732	0.0722
V$MINI20_B	0.701	0.1006
V$MITF_Q6	0.0427	0.382
V$MIZF_01	0.457	0.785
V$MMEF2_Q6	0.021	0.658
V$MOVOB_01	0.738	0.188
V$MOX1_01	0.0027	0.62
V$MRF2_01	0.1588	0.669
V$MRG2_01	0	0.281
V$MSX1_01	0.0087	0.956
V$MSX1_02	0.0012	0.546
V$MSX2_01	0.013	0.936
V$MSX2_Q3	0.0215	0.702
V$MSX3_01	0.004	0.781
V$MTATA_B	0.0249	0.451
V$MTERF_01	0.543	0.007
V$MTF1_01	0.327	0.433
V$MTF1_02	0.541	0.0927
V$MTF1_05	0.0509	0.38
V$MTF1_06	0.0202	0.839
V$MTF1_Q4	0.197	0.0796
V$MUSCLEINI_B	0.706	0.164
V$MYB_03	0.938	0.776
V$MYB_05	0.708	0.847
V$MYB_Q3	0.432	0.668
V$MYB_Q5_01	0.597	0.725
V$MYB_Q6	0.399	0.678
V$MYBL1_03	0.566	0.765
V$MYBL1_04	0.872	0.76
V$MYC_01	0.475	0.165
V$MYC_Q2	0.861	0.199
V$MYCMAX_01	0.707	0.0637
V$MYCMAX_02	0.1628	0.0338
V$MYCMAX_03	0.506	0.336
V$MYCMAX_B	0.195	0.0051
V$MYCN_01	0.412	0.1422
V$MYF_01	0.689	0.0092
V$MYF6_03	0.0045	0.302
V$MYF6_04	0.745	0.0546
V$MYOD_01	0.0308	0.188
V$MYOD_Q6	0.0127	0.246
V$MYOD_Q6_01	0.0106	0.344
V$MYOD_Q6_02	0.0747	0.294
V$MYOGENIN_Q6	0.0763	0.39
V$MYOGENIN_Q6_01	0.0128	0.0762
V$MYOGNF1_01	0.769	0.0209
V$MZF1_01	0.94	0.0606
V$MZF1_02	1	0.432
V$MZF1_Q5	0.794	0.298
V$NANOG_01	0.0947	0.14
V$NANOG_02	0.181	0.746
V$NCX_01	0.008	0.455
V$NCX_02	0.0143	0.792
V$NERF_01	0.236	0.17
V$NERF_Q2	0.692	0.309
V$NET_01	0.319	0.822
V$NET_02	0.348	0.63
V$NEUROD_01	0.0611	0.257
V$NEUROD_02	0.214	0.191
V$NF1_Q6	0.926	0.413
V$NF1_Q6_01	0.822	0.25
V$NF1A_Q6_01	0.804	0.587
V$NFAT_Q4_01	0.029	0.419
V$NFAT_Q6	0.0228	0.436
V$NFAT1_Q4	0.0278	0.387
V$NFAT1_Q6	0.0257	0.405
V$NFAT2_02	0.007	0.184
V$NFAT2_Q5	0.0228	0.386
V$NFAT3_Q3	0.0184	0.078
V$NFAT4_Q3	0.1372	0.283
V$NFAT5_Q5_01	0.0995	0.012
V$NFATC2_01	0.0144	0.331
V$NFE2_01	0.0075	0.1455
V$NFE2_Q6	0.0321	0.214
V$NFE2L2_01	0.0085	0.36
V$NFE4_Q5	0.691	0.0503
V$NFKAPPAB_01	0.303	0.0031
V$NFKAPPAB50_01	0.551	0.0074
V$NFKAPPAB65_01	0.705	0.136
V$NFKB_C	0.729	0.0039
V$NFKB_Q6	0.328	0.0033
V$NFKB_Q6_01	0.519	0.0209
V$NFMUE1_Q6	0.608	0.593
V$NFY_01	0.664	0.455
V$NFY_C	0.0015	0.743
V$NFY_Q6	0.591	0.881
V$NFY_Q6_01	0.644	0.572
V$NFYA_Q5	0.659	0.214
V$NFYC_Q5	0.682	0.0895
V$NGFIC_01	0.503	0.0727
V$NKX11_01	0.0013	0.542
V$NKX12_01	0.0015	0.596
V$NKX21_01	0.0089	0.1505
V$NKX22_01	9.00E-04	0.919
V$NKX22_02	0.0503	0.373
V$NKX23_01	0.0023	0.284
V$NKX24_01	0	0.0357
V$NKX25_01	2.00E-04	0.359
V$NKX25_02	0.0023	0.581
V$NKX25_03	0	0.218
V$NKX25_Q5	0.202	0.531
V$NKX25_Q6	0.0297	0.621
V$NKX26_01	1.00E-04	0.656
V$NKX29_01	0.003	0.305
V$NKX2B_Q3	0.0066	0.347
V$NKX31_02	0.446	0.477
V$NKX32_01	0.0373	0.47
V$NKX32_02	0.0179	0.237
V$NKX3A_01	0.0201	0.682
V$NKX3A_02	4.00E-04	0.542
V$NKX52_01	7.00E-04	0.686
V$NKX61_01	0.0053	0.546
V$NKX61_02	0.0563	0.997
V$NKX61_03	0.021	0.966
V$NKX62_Q2	0.048	0.875
V$NKX63_01	0.0012	0.69
V$NMYC_01	0.526	0.0244
V$NMYC_02	0.0287	0.517
V$NR1B1_Q6	0.0024	0.015
V$NR1B2_Q6	3.00E-04	0.422
V$NR2F2_03	0.0773	0.693
V$NR2F2_04	0.161	0.479
V$NR3C1_01	0.1372	0.568
V$NR4A2_01	0.0095	0.212
V$NRF1_Q6	0.436	0.487
V$NRF1_Q6_01	0.389	0.337
V$NRF2_01	0.52	0.595
V$NRF2_Q4	0.001	0.381
V$NRSE_B	0.402	0.0232
V$NRSF_01	0.0831	0.392
V$NRSF_Q4	0.313	0.0501
V$NUR77_Q5	0.601	0.0132
V$NURR1_Q3	0.0593	0.757
V$OBOX1_01	0	0.473
V$OBOX2_01	2.00E-04	0.47
V$OBOX2_02	0.177	0.863
V$OBOX3_01	0	0.412
V$OBOX3_02	0.1167	0.686
V$OBOX5_01	3.00E-04	0.734
V$OBOX5_02	1.00E-04	0.639
V$OBOX5_05	0.408	0.196
V$OBOX6_01	7.00E-04	0.51
V$OBOX6_02	0.207	0.602
V$OBOX6_06	0.168	0.6
V$OC2_Q3	0.009	1
V$OCAB_Q6	0.186	0.822
V$OCT_C	0.0033	0.548
V$OCT_Q6	5.00E-04	0.75
V$OCT1_01	0.0128	1
V$OCT1_02	0.0066	0.901
V$OCT1_03	0.0245	0.556
V$OCT1_04	0.0207	0.972
V$OCT1_05	3.00E-04	0.649
V$OCT1_06	0.0011	0.524
V$OCT1_07	0.0491	0.999
V$OCT1_08	0.0069	0.714
V$OCT1_B	0.0019	0.862
V$OCT1_Q5_01	8.00E-04	0.632
V$OCT1_Q6	0.0077	0.637
V$OCT2_01	2.00E-04	0.951
V$OCT4_01	0.0019	0.984
V$OCT4_02	0.0019	0.874
V$OCTAMER_01	1.00E-04	0.38
V$OCTAMER_02	0.0445	0.952
V$OG2_01	0.0106	1
V$OG2_02	0.1576	1
V$OLF1_01	0.296	0.0983
V$OSF2_Q6	0.919	0.94
V$OSR1_03	0.112	0.545
V$OSR1_04	0.829	0.191
V$OSR2_03	0.0928	0.769
V$OSR2_04	0.528	0.688
V$OTP_01	0.0039	0.658
V$OTX_Q1	0.0266	0.631
V$OTX1_01	4.00E-04	0.61
V$OTX2_01	0.106	0.431
V$OTX2_Q3	0.087	0.664
V$OTX3_01	4.00E-04	0.528
V$P300_01	0.901	0.816
V$P50_Q6	0.996	0.0412
V$P50P50_Q3	0.432	0.717
V$P50RELAP65_Q5_01	0.908	0.0027
V$P53_01	0.841	0.0717
V$P53_02	0.394	0.1544
V$P53_03	0.416	9.00E-04
V$P53_04	0.312	3.00E-04
V$P53_05	0.914	0.299
V$P53DECAMER_Q2	0.621	0.0414
V$P63_01	0.0491	0.723
V$P73_Q6	0.59	0.0045
V$PADS_C	0.703	0.956
V$PARP_Q3	0.0057	0.19
V$PARP_Q4	0.0268	0.531
V$PAX_Q6	0.439	0.0012
V$PAX1_B	1	1
V$PAX2_01	0.0021	0.48
V$PAX2_02	0.0455	0.764
V$PAX3_01	0.422	0.0173
V$PAX3_B	0.0423	0.0475
V$PAX4_01	0.305	0.162
V$PAX4_02	0.0052	0.866
V$PAX4_03	0.999	0.776
V$PAX4_04	0.442	0.925
V$PAX4_05	0.0483	0.991
V$PAX5_01	0.977	0.0042
V$PAX5_02	0.185	0.0035
V$PAX5_Q6	0.764	0.0384
V$PAX6_01	0.0584	0.827
V$PAX6_02	0.0104	0.839
V$PAX6_Q2	0.35	0.003
V$PAX7_01	0.001	0.604
V$PAX8_01	0.0034	0.86
V$PAX8_B	0.473	0.937
V$PAX9_B	0.753	0.0698
V$PBX_Q3	0.0163	0.287
V$PBX1_01	0.0112	0.726
V$PBX1_02	0.0016	0.507
V$PBX1_03	0	0.603
V$PBX1_04	0	0.989
V$PBX1_05	0.289	0.277
V$PBX1_Q3	0.0143	0.38
V$PDEF_01	0.462	0.1148
V$PDEF_02	0.484	0.0998
V$PEA3_01	0.333	0.005
V$PEA3_02	0.191	0.0089
V$PEA3_Q6	0.986	0.0052
V$PEA3_Q6_02	0.555	0.1272
V$PEBP_Q6	0.45	0.891
V$PET1_01	0.147	0.023
V$PET1_02	0.226	0.211
V$PIT1_01	0.0221	0.76
V$PIT1_Q6	0	0.1405
V$PIT1_Q6_01	0	0.494
V$PITX1_01	0.1513	0.175
V$PITX1_Q6	0.0847	0.287
V$PITX2_01	0.1185	0.208
V$PITX2_Q2	0.0017	0.246
V$PITX2_Q6	0.464	0.541
V$PITX3_01	0.0031	0.561
V$PITX3_Q2	0.0418	0.303
V$PKNOX2_01	0.0015	0.28
V$PLAG1_01	0.531	0.0328
V$PLAG1_02	0.609	0.0667
V$PLAGL1_03	0.584	0.052
V$PLAGL1_04	0.869	0.694
V$PLZF_02	0.0106	0.65
V$PMX1_Q6	0.0254	0.578
V$PMX2A_01	0.0039	0.705
V$PMX2B_01	0.0014	0.717
V$PNR_01	0.1361	0.966
V$POLY_C	0.194	0.1357
V$POU1F1_Q6	2.00E-04	0.964
V$POU2F1_Q6	4.00E-04	0.743
V$POU2F3_01	8.00E-04	0.77
V$POU3F2_01	2.00E-04	0.878
V$POU3F2_02	0.0051	0.952
V$POU3F3_01	0.275	0.999
V$POU5F1_01	0	0.28
V$POU6F1_01	0.0042	0.834
V$POU6F1_02	0.0014	0.512
V$POU6F1_03	6.00E-04	0.609
V$PPARA_01	1.00E-04	0.548
V$PPARA_02	0.79	0.108
V$PPARDR1_Q2	3.00E-04	0.368
V$PPARG_01	0	0.223
V$PPARG_02	1.00E-04	0.17
V$PPARG_03	0.0128	0.587
V$PPARGRXRA_01	0.0023	0.179
V$PR_01	0.0554	0.843
V$PR_02	0.032	0.97
V$PR_Q6	0.0083	0.527
V$PREP1_01	0	0.313
V$PROP1_01	0.171	0.605
V$PROP1_02	0.0022	0.711
V$PRX2_Q2	0.003	0.775
V$PSX1_01	0.003	0.714
V$PTF1BETA_Q6	0.001	0.629
V$PU1_Q4	0.161	0.1047
V$PU1_Q6	0.257	0.1649
V$PUR1_Q4	0.871	0.0414
V$R_01	0.613	0.183
V$RARA_03	0.0142	0.505
V$RARA_04	1	0.0449
V$RARG_Q3	0.0454	0.0433
V$RAX_01	0.0015	0.586
V$RBPJK_01	0.0574	0.702
V$RBPJK_Q4	0.0021	0.172
V$RELA_Q6	0.803	0.0078
V$RELBP52_01	0.409	0.142
V$REST_01	0.83	0.216
V$REX1_01	0.995	0.614
V$REX1_02	0.99	0.549
V$REX1_03	0.554	0.627
V$RFX_Q6	0.652	0.936
V$RFX1_01	0.795	0.1478
V$RFX1_02	0.702	0.291
V$RFX3_04	1	0.671
V$RFX3_05	0.203	0.777
V$RFX4_03	0.995	0.44
V$RFX4_04	0.738	0.254
V$RFXDC2_03	1	0.775
V$RFXDC2_04	0.642	0.371
V$RHOX11_01	0.0157	0.655
V$RHOX11_02	0.0325	0.752
V$RHOX11_05	0.26	0.577
V$RHOX11_06	0.705	0.296
V$RNF96_01	0.292	0.0027
V$ROAZ_01	0.74	0.23
V$RORA_Q4	0.0035	0.335
V$RORA1_01	0.163	0.1182
V$RORA2_01	2.00E-04	0.893
V$RORBETA_Q2	0.244	0.578
V$RP58_01	0.583	0.218
V$RPC155_01	0.88	0.0517
V$RREB1_01	1	0.783
V$RSRFC4_01	0.0789	1
V$RSRFC4_Q2	0.254	1
V$RUSH1A_02	0	0.23
V$RXRA_03	0.257	0.0078
V$RXRA_04	1.00E-04	0.1485
V$RXRLXRB_01	0.581	0.392
V$RXRPXR_Q2	4.00E-04	0.467
V$RXRRAR_01	0.0011	0.151
V$S8_01	0.821	0.621
V$S8_02	0.917	0.651
V$SAP1A_01	0.454	0.1345
V$SAP1A_02	0.333	0.686
V$SAP1A_03	0.338	0.813
V$SATB1_01	0.0091	0.968
V$SATB1_Q3	0.0653	0.453
V$SATB1_Q5_01	0.0584	0.631
V$SEF1_C	0.872	0.219
V$SF1_Q5	0.0012	0.303
V$SF1_Q6	0	0.049
V$SF1_Q6_01	3.00E-04	0.0873
V$SFPI1_04	0.0302	0.0782
V$SHOX2_01	0.0016	0.736
V$SIRT6_01	9.00E-04	0.0253
V$SIX1_01	1.00E-04	0.361
V$SIX2_01	1.00E-04	0.546
V$SIX3_01	3.00E-04	0.492
V$SIX4_01	1	0.833
V$SIX6_01	3.00E-04	0.486
V$SIX6_02	0	0.407
V$SIX6_08	0.0561	0.736
V$SLUG_Q6	0.1381	0.0247
V$SMAD_Q6	0.943	0.0877
V$SMAD_Q6_01	0.414	0.4
V$SMAD1_01	0.0158	0.899
V$SMAD2_Q6	0.0056	0.1169
V$SMAD3_03	0.1101	0.1895
V$SMAD3_Q6	0.974	0.222
V$SMAD3_Q6_01	0.0392	0.618
V$SMAD4_04	0.249	0.0067
V$SMAD4_Q6	0.984	0.0401
V$SMAD4_Q6_01	0.404	0.339
V$SNA_Q4	0.12	0.378
V$SOX_01	0	0.319
V$SOX_Q6	0.0015	0.164
V$SOX1_03	0.0037	0.725
V$SOX1_04	0.0557	1
V$SOX10_01	0.0016	0.539
V$SOX10_Q6	0.0367	0.999
V$SOX10_Q6_01	0.0366	1
V$SOX11_03	0.472	0.899
V$SOX11_04	0.1467	0.999
V$SOX12_03	0.294	0.999
V$SOX12_04	0.17	0.805
V$SOX13_03	0.0664	0.976
V$SOX13_04	0.846	0.0525
V$SOX14_03	0.0395	0.655
V$SOX14_05	0.0706	0.918
V$SOX15_03	0.1041	0.993
V$SOX15_04	9.00E-04	0.477
V$SOX17_04	0	0.673
V$SOX17_Q2	0.33	0.905
V$SOX18_03	0.1178	0.975
V$SOX18_04	1.00E-04	0.722
V$SOX2_01	0.0155	0.484
V$SOX2_Q6	0.866	0.351
V$SOX21_03	0.0532	0.702
V$SOX21_04	0.022	0.97
V$SOX30_03	0.0938	1
V$SOX4_01	0.0022	0.651
V$SOX40_04	0.0981	0.639
V$SOX5_01	0.0015	0.772
V$SOX5_04	0.0024	0.872
V$SOX5_07	0.1367	1
V$SOX7_03	0.486	0.992
V$SOX7_04	0.0881	0.945
V$SOX8_03	0.0491	0.925
V$SOX8_04	1.00E-04	0.842
V$SOX9_B1	0.001	0.981
V$SOX9_Q4	0.0032	0.611
V$SP1_01	0.366	0.0099
V$SP1_02	0.565	0.0152
V$SP1_03	0.696	0.09
V$SP1_Q2_01	0.514	0.0426
V$SP1_Q4_01	0.486	0.048
V$SP1_Q6	0.387	0.0236
V$SP1_Q6_01	0.4	0.0317
V$SP100_03	0.0795	0.763
V$SP100_04	0.096	0.0022
V$SP1SP3_Q4	0.469	0.025
V$SP2_01	0.229	0.0019
V$SP2_Q3	0.507	0.0365
V$SP2_Q3_01	0.493	0.0525
V$SP3_Q3	0.732	0.1041
V$SP4_03	0.335	0.0327
V$SP4_04	0.1042	0.0373
V$SP4_Q5	0.512	0.115
V$SPDEF_03	0.451	0.1454
V$SPDEF_04	0.0027	0.0505
V$SPI1_01	0.973	0.0338
V$SPI1_02	0.868	0.061
V$SPI1_03	0.907	0.1525
V$SPI1_04	0.214	0.0913
V$SPI1_Q5	0.777	0.0539
V$SPIB_01	0.486	0.14
V$SPIB_02	0.948	0.0086
V$SPIB_03	0.811	0.0961
V$SPIC_01	0.869	0.258
V$SPIC_02	0.99	0.0638
V$SPZ1_01	0.432	0.0142
V$SREBP_Q3	0.895	0.793
V$SREBP_Q6	0.728	0.925
V$SREBP1_01	0.014	0.201
V$SREBP1_02	0.874	0.327
V$SREBP1_Q5	0.674	0.937
V$SREBP1_Q6	0.924	0.55
V$SREBP2_Q6	1	0.426
V$SRF_01	0.319	0.0272
V$SRF_02	0.835	0.0017
V$SRF_03	0.997	0.0074
V$SRF_06	0.037	0.877
V$SRF_C	0.981	0.0094
V$SRF_Q4	0.859	0.0166
V$SRF_Q5_01	0.51	0.0704
V$SRF_Q5_02	0.721	0.0456
V$SRF_Q6	0.996	0.23
V$SRY_01	0.0613	0.904
V$SRY_02	0.0304	0.982
V$SRY_05	0.0156	0.955
V$SRY_07	0.182	0.993
V$STAF_01	0.843	0.742
V$STAF_02	1	0.982
V$STAT_01	0.0028	0.545
V$STAT_Q6	0.327	0.43
V$STAT1_01	0.586	0.381
V$STAT1_05	0.0219	0.427
V$STAT1_Q6	0.0108	0.272
V$STAT1STAT1_Q3	0.275	0.173
V$STAT3_01	0.553	0.209
V$STAT3_03	0.583	0.0234
V$STAT3STAT3_Q3	0.753	0.737
V$STAT4_Q4	0.215	0.728
V$STAT4_Q5	0	0.262
V$STAT5A_01	0.0269	0.185
V$STAT5A_02	0.0074	0.302
V$STAT5A_Q6	0.215	0.259
V$STAT5B_01	0.0754	0.1365
V$STRA13_01	0.506	0.846
V$SZF11_01	1	0.1295
V$T3R_01	0.997	0.271
V$T3RALPHA_Q6	0.674	0.318
V$T3RBETA_Q6_01	0.837	0.1372
V$TAACC_B	0.234	0.882
V$TAL1_01	0.0241	0.004
V$TAL1_Q6	0.789	0.295
V$TAL1_Q6_01	0.0381	0.269
V$TAL1ALPHAE47_01	5.00E-04	0.1234
V$TAL1BETAE47_01	0.0612	0.217
V$TAL1BETAITF2_01	0.0374	0.388
V$TATA_01	0.0227	0.653
V$TATA_C	0.0731	0.797
V$TAXCREB_01	0.166	0.0112
V$TAXCREB_02	0.457	0.0829
V$TBP_01	0.0183	0.717
V$TBP_04	0.248	0.764
V$TBP_06	0.0332	0.805
V$TBP_Q6	0.0618	0.791
V$TBP_Q6_01	0.059	0.851
V$TBR2_01	0.0579	0.569
V$TBX15_01	1	1
V$TBX15_02	1	1
V$TBX18_01	1	1
V$TBX22_01	1	1
V$TBX5_01	0.753	0.936
V$TBX5_02	1	0.959
V$TBX5_Q5	0	0.727
V$TCF1_06	0.0092	0.543
V$TCF1_07	0	0.479
V$TCF11_01	2.00E-04	0.202
V$TCF11MAFG_01	0.001	0.254
V$TCF3_01	0.0347	0.956
V$TCF3_04	0.0094	1
V$TCF3_05	0.0168	0.625
V$TCF4_01	0.0426	1
V$TCF4_Q5	6.00E-04	0.823
V$TCF4_Q5_01	0.114	0.983
V$TCF7_03	0.0147	0.985
V$TCF7_04	0.0028	0.722
V$TCF7L2_04	0.0095	0.864
V$TCFAP2A_03	0.648	0.0096
V$TCFAP2B_03	0.838	0.0162
V$TCFAP2B_04	0.538	0.008
V$TCFAP2C_03	0.633	0.0167
V$TCFAP2C_04	0.582	0.0138
V$TCFAP2E_03	0.808	0.0226
V$TCFAP2E_04	0.031	0.788
V$TCFE2A_03	0.173	0.63
V$TCFE2A_04	0.0013	0.506
V$TEF_01	0.0058	0.521
V$TEF_Q6	0.0692	0.879
V$TEF1_Q6	0.177	0.499
V$TEF1_Q6_03	0.0624	0.644
V$TEL1_01	0.718	0.302
V$TEL1_02	0.745	0.326
V$TEL2_Q6	0.925	0.0822
V$TFE_Q6	0.0089	0.206
V$TFEB_01	0.612	0.376
V$TFIIA_Q6	0.0011	0.006
V$TFIIB_Q6	0	0.36
V$TFIII_Q6	0.708	0.249
V$TGIF_01	0.256	0.1276
V$TGIF_02	0.1238	0.182
V$TGIF1_01	0.413	0.1613
V$TGIF2_01	0	0.286
V$TITF1_Q3	0	0.0309
V$TR4_01	0.829	0.0098
V$TR4_03	0.975	0.359
V$TR4_Q2	5.00E-04	0.525
V$TR4_Q2_01	0.384	0.1208
V$TRF1_01	0.403	0.57
V$TST1_01	0.0271	0.942
V$TST1_02	0.0155	0.905
V$TTF1_Q5	0.0935	0.0207
V$TTF1_Q6	0.009	0.0373
V$TWIST_Q6	0.0356	0.393
V$UF1H3BETA_Q6	0.461	0.783
V$UNCX4.1_01	0.0038	0.655
V$USF_01	0.466	0.0599
V$USF_02	0.0023	0.406
V$USF_C	0.0549	0.0646
V$USF_Q6	0.298	0.0162
V$USF_Q6_01	0.12	0.1496
V$USF2_Q6	0.169	0.0707
V$VAX1_01	0.0015	0.631
V$VAX2_01	0.0032	0.691
V$VBP_01	0.0471	0.944
V$VDR_Q3	0.844	0.239
V$VDR_Q6_01	0.371	0.199
V$VDRRXR_01	0.989	0.706
V$VJUN_01	0.991	0.716
V$VMAF_01	0.305	0.0991
V$VMYB_01	0.468	0.568
V$VMYB_02	0.544	0.299
V$VSX1_01	0.003	0.672
V$WHN_B	0.189	0.269
V$WT1_Q6	0.489	0.0296
V$WT1_Q6_01	0.594	0.0539
V$XBP1_01	0.412	0.464
V$XBP1_02	0.388	0.0615
V$XFD1_01	0.0825	0.861
V$XFD2_01	0.239	0.994
V$XFD3_01	0.0026	0.325
V$XPF1_Q6	1	0.433
V$XVENT1_01	0.061	0.959
V$YB1_Q3	0.484	0.197
V$YY1_01	0	0.75
V$YY1_02	0.362	0.309
V$YY1_03	0.788	0.992
V$YY1_Q6	0.0037	0.484
V$YY1_Q6_02	7.00E-04	0.223
V$YY1_Q6_03	1.00E-04	0.264
V$YY2	0.0633	0.046
V$ZABC1_01	0.572	0.316
V$ZBED6_01	0.439	0.0027
V$ZBP89_Q4	0.622	0.0883
V$ZBRK1_01	0.965	0.0811
V$ZBTB12_03	0.1633	0.247
V$ZBTB12_04	0.0194	0.398
V$ZBTB3_03	0.348	0.714
V$ZBTB4_04	0.132	0.0479
V$ZBTB7B_03	0.963	0.762
V$ZBTB7B_04	0.984	0.289
V$ZBTB7C_Q2	0.316	0.0057
V$ZEC_01	0.501	0.0597
V$ZF5_01	0.314	0.0055
V$ZF5_B	0.188	0.0051
V$ZFP105_03	0.171	0.88
V$ZFP105_04	2.00E-04	0.992
V$ZFP128_03	0.824	0.635
V$ZFP128_04	0.0089	0.928
V$ZFP161_04	0.1283	0.0014
V$ZFP187_03	0.818	0.676
V$ZFP187_04	0.309	0.164
V$ZFP206_01	0.501	0.769
V$ZFP281_01	0.768	0.697
V$ZFP281_04	0.804	0.463
V$ZFP281_05	0.891	0.518
V$ZFP410_03	0.788	0.446
V$ZFP410_04	0.513	0.0103
V$ZFP691_03	0.602	0.444
V$ZFP691_04	0.997	0.0083
V$ZFP740_03	0.861	0.485
V$ZFP740_04	0.739	0.204
V$ZFX_01	0.341	0.0271
V$ZIC1_01	0.559	0.0102
V$ZIC1_04	0.307	2.00E-04
V$ZIC1_05	0.736	0.0019
V$ZIC2_01	0.892	0.1099
V$ZIC2_04	0.377	0.001
V$ZIC2_05	0.682	0.0017
V$ZIC3_01	0.783	0.0422
V$ZIC3_04	0.404	0.01
V$ZIC3_05	0.762	7.00E-04
V$ZID_01	0.929	0.449
V$ZNF219_01	0.905	0.59
V$ZNF333_01	0.174	0.99
V$ZNF515_01	0.868	0.507
V$ZSCAN4_03	0.1132	0.1154
V$ZSCAN4_04	0.0506	0.212
V$ZTA_Q2	0.198	0.998
